# Supplementary material
Source: publisher site journal article supplement (https://www.dovepress.com/article/212080)
Supplement: Supplementary file 1 [file get_supplementary_file.php]

**Supplementary Table 1** Two-way repeated-measures ANOVA exploring the effects of gender (female and male) and condition (silence, music, and noise) on subjective ratings of pain intensity (PI) and unpleasantness (PU).

|  | Gender | | |  | Condition | | |  | Interaction | | |
| --- | --- | --- | --- | --- | --- | --- | --- | --- | --- | --- | --- |
|  | *F*(1,28) | *p* | *ηp2* |  | *F*(2,56) | *p* | *ηp2* |  | *F*(2,56) | *p* | *ηp2* |
| PI | 0.03 | 0.867 | 0.001 |  | 2.31 | 0.109 | 0.08 |  | 1.43 | 0.248 | 0.05 |
| PU | 0.07 | 0.793 | 0.002 |  | 6.24 | 0.004 | 0.18 |  | 0.76 | 0.474 | 0.03 |

**Supplementary Table 2** Two-way repeated-measures ANOVA exploring the effects of gender (female and male) and condition (silence, music, and noise) on the amplitude (V) and latency (ms) of N2 and P2 waves.

|  | Gender | | |  | Condition | | |  | Interaction | | |
| --- | --- | --- | --- | --- | --- | --- | --- | --- | --- | --- | --- |
|  | *F*(1,28) | *p* | *ηp2* |  | *F*(2,56) | *p* | *ηp2* |  | *F*(2,56) | *p* | *ηp2* |
| N2amp | 1.49 | 0.232 | 0.05 |  | 2.64 | 0.080 | 0.09 |  | 1.91 | 0.158 | 0.06 |
| N2lat | 0.04 | 0.838 | 0.002 |  | 0.81 | 0.450 | 0.03 |  | 0.20 | 0.818 | 0.007 |
| P2amp | 0.05 | 0.818 | 0.002 |  | 5.13 | 0.009 | 0.16 |  | 0.25 | 0.779 | 0.009 |
| P2lat | 0.93 | 0.342 | 0.03 |  | 1.02 | 0.367 | 0.04 |  | 0.25 | 0.779 | 0.009 |


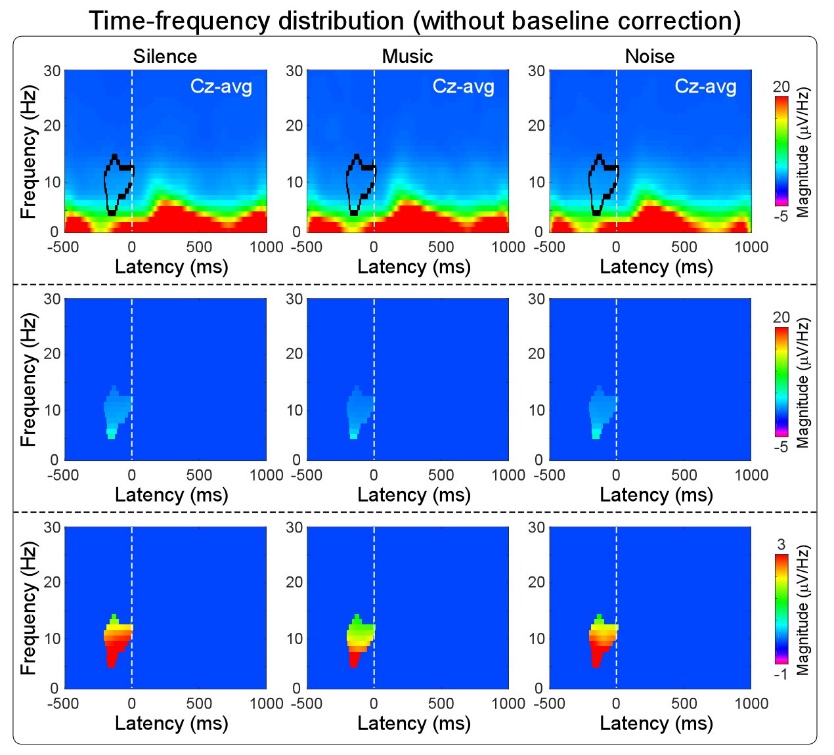


**Supplementary Figure 1**. The comparison of the magnitude in the prestimulus time-frequency cluster using different colorbar scales.
